# Supplementary material
Source: PubMed Central journal article supplement (PMC10160697)

VSV $\Delta$ g-SPIKEeGFP + serum dilutions

Mock

$10^0$

$10^{-2}$

$10^{-3}$

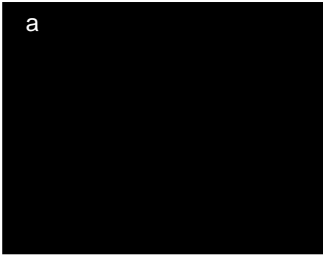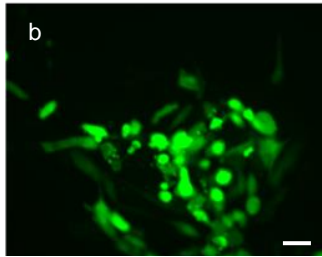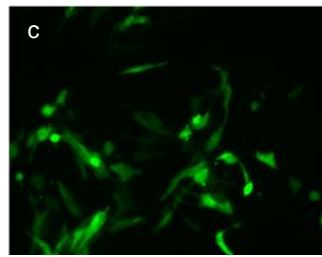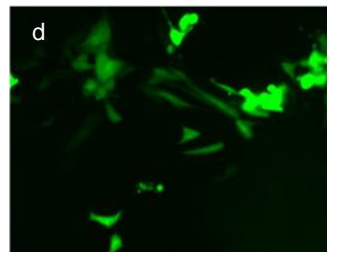

5,21%

49,5%

61,15%

51%

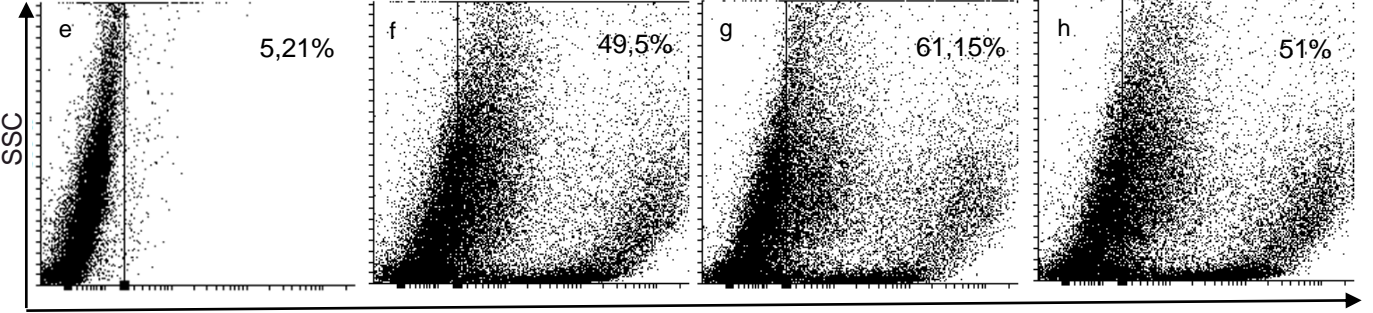

VSV $\Delta$ g-SPIKEeGFP

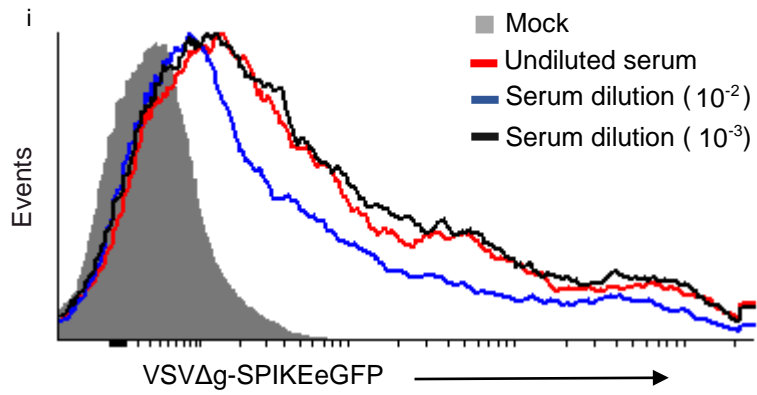

Supplement: mmc2.pdf [file mmc2.pdf]

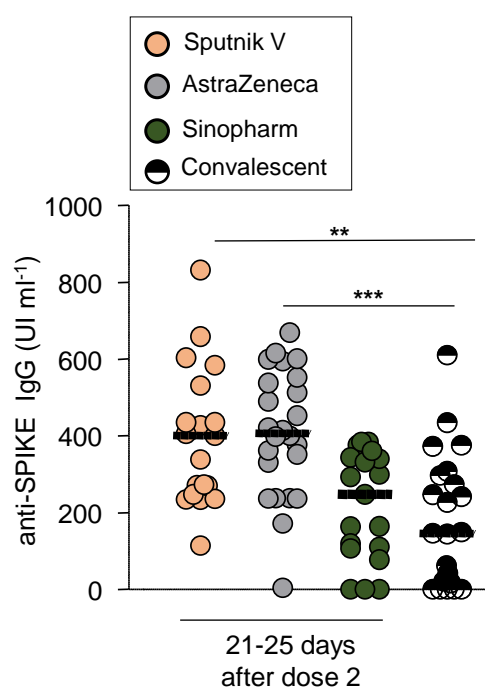

Supplementary Figure 3  
Giai, et al

Supplement: mmc3.pdf [file mmc3.pdf]

**A**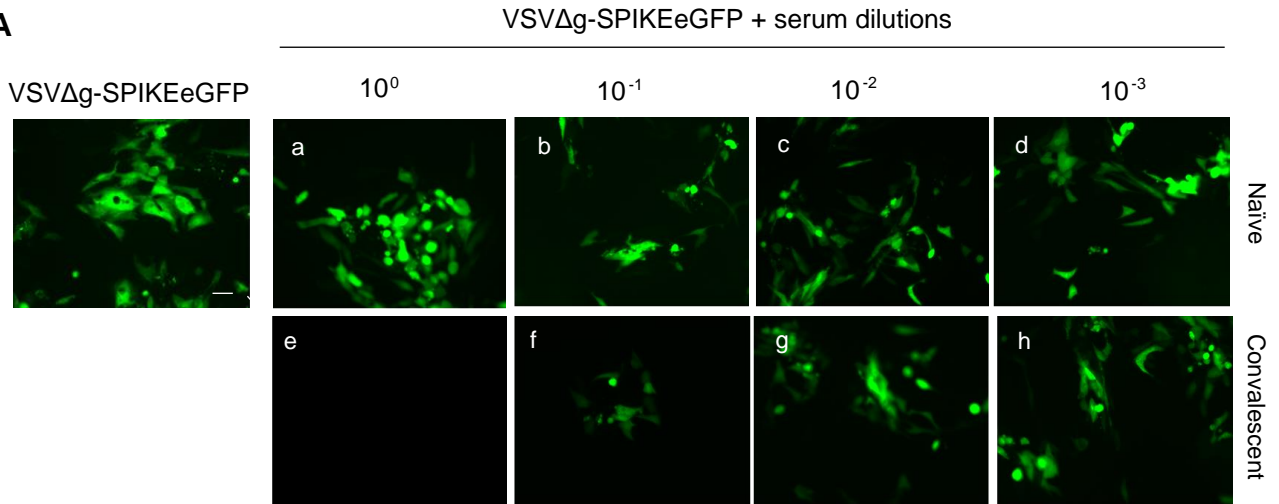**B**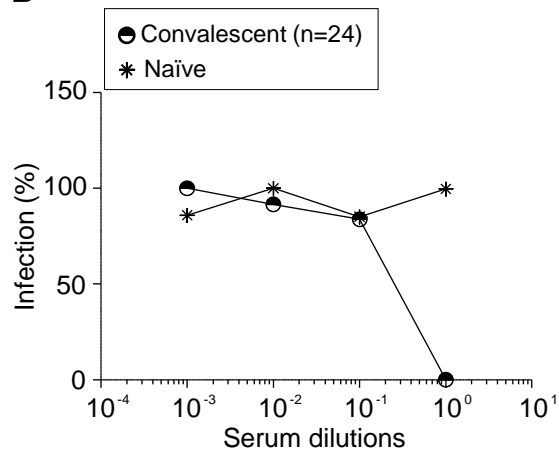**C**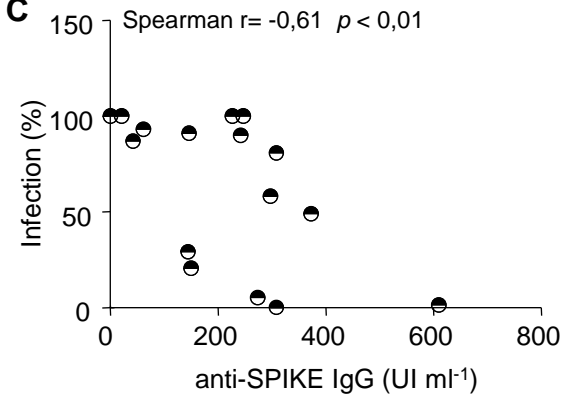

Supplement: mmc4.pdf [file mmc4.pdf]
